# Supplementary material
Source: PubMed Central journal article supplement (PMC7243464)
Supplement: NIHMS1068272-supplement-suppl_fig.pdf [file NIHMS1068272-supplement-suppl_fig.pdf]

SUPPORTING INFORMATION

**Isoprene-derived Secondary Organic Aerosol Induces the Expression of micro RNAs (miRNAs) Associated with Inflammatory/Oxidative Stress Response in Lung Cells**

*Lauren A. Eaves<sup>1</sup>, Lisa Smeester<sup>1</sup>, Hadley J. Hartwell<sup>1</sup>, Ying-Hsuan Lin<sup>2</sup>, Maiko Arashiro<sup>3</sup>, Zhenfa Zhang<sup>1</sup>, Avram Gold<sup>1</sup>, Jason D. Surratt<sup>1</sup>, Rebecca C. Fry\*<sup>1,4,5</sup>*

1. Department of Environmental Sciences & Engineering, Gillings School of Global Public Health, University of North Carolina at Chapel Hill, Chapel Hill, NC, USA

2. Department of Environmental Sciences, University of California, Riverside, 9252, USA

3. Department of Environmental Studies, Dickinson College, Carlisle, PA, 17013, USA

4. Curriculum in Toxicology, University of North Carolina at Chapel Hill, Chapel Hill, NC 27599, USA

5. Institute for Environmental Health Solutions, Gillings School of Global Public Health, University of North Carolina at Chapel Hill, Chapel Hill, NC, 27599, USA

KEYWORDS: PM<sub>2.5</sub>, secondary organic aerosol, isoprene, miRNA,  
oxidative stress, inflammation

CORRESPONDING AUTHOR

**Rebecca C. Fry, [rfry@unc.edu](mailto:rfry@unc.edu)**

TABLE OF CONTENTS

S3..... Supplementary Figure S1

S4..... Supplementary Figure S2

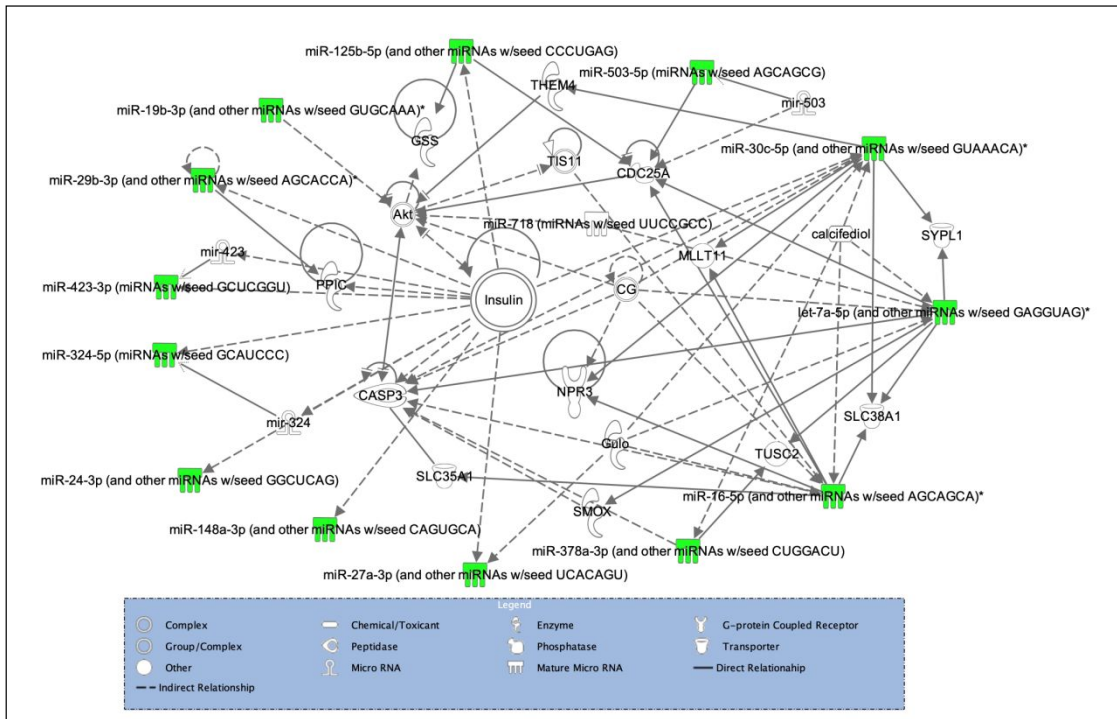

Supplementary Figure S1. Significant molecular network of modulated miRNAs affected by IEPOX-SOA exposure. miRNAs found to be differentially expressed in response to IEPOX-SOA are highlighted in green. *p*-Value representing the probability of these interactions occurring by chance =  $10^{-34}$ .

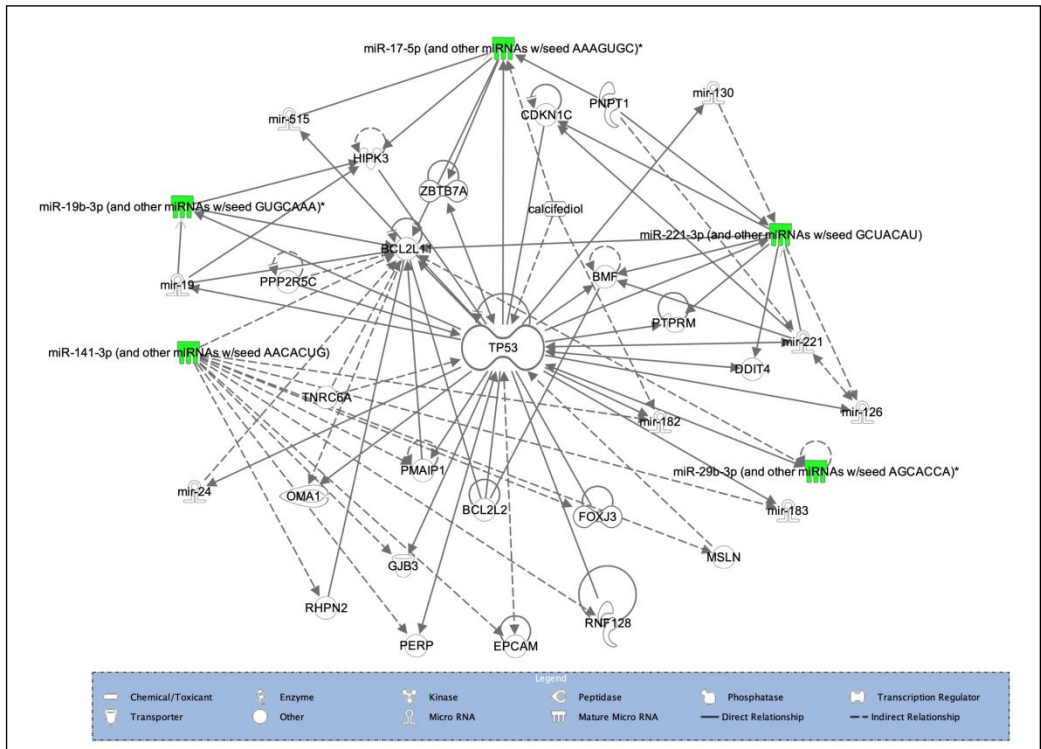

Supplementary Figure S2. Significant molecular network of modulated miRNAs affected by IEPOX-SOA exposure. miRNAs found to be differentially expressed in response to IEPOX-SOA are highlighted in green. *p*-Value representing the probability of these interactions occurring by chance =  $10^{-10}$ .
